# Supplementary material
Source: PubMed Central journal article supplement (PMC5925794)
Supplement: supp_RA117.001421_134616_1_supp_85398_p4421r.pdf [file supp_RA117.001421_134616_1_supp_85398_p4421r.pdf]

## **The Hcp-like protein HilE inhibits homodimerization and DNA binding of the virulence-associated transcriptional regulator HilD in *Salmonella***

Claudia C. Paredes-Amaya<sup>1</sup>, Gilberto Valdés-García<sup>2</sup>, Víctor R. Juárez-González<sup>2</sup>, Enrique Rudiño-Piñera<sup>2</sup> and Víctor H. Bustamante<sup>1\*</sup>

From the <sup>1</sup>Departamento de Microbiología Molecular, <sup>2</sup>Departamento de Medicina Molecular y Bioprocesos, Instituto de Biotecnología, Universidad Nacional Autónoma de México, Cuernavaca, Morelos, 62210, México.

Running title: *HilE controls dimerization and DNA binding of HilD*

\*To whom correspondence should be addressed: Víctor H. Bustamante, Departamento de Microbiología Molecular, Instituto de Biotecnología, Universidad Nacional Autónoma de México. Telephone: (52) 777-329-1627. Fax: (52) 777-313-8673. E-mail address: [victor@ibt.unam.mx](mailto:victor@ibt.unam.mx)

### **Supporting information**

Table S1. Bacterial strains and plasmids used in this study

Table S2. Primers used in this study

Figure S1. Gel filtration chromatography of MBP-HilD

Figure S2. The *hilE* gene is located in a genomic island of *S. Typhimurium* and *S. bongori* that is absent in *E. coli* K-12

Supplementary references

Table S1. Bacterial strains and plasmids used in this study

| Strain or plasmid             | Genotype or description                                                                                        | Reference or source |
|-------------------------------|----------------------------------------------------------------------------------------------------------------|---------------------|
| <b>Strains</b>                |                                                                                                                |                     |
| <i>S. Typhimurium</i> strains |                                                                                                                |                     |
| SL1344                        | Wild type; <i>xyl hisG rpsL</i> ; Sm <sup>R</sup>                                                              | (1)                 |
| 14028s                        | Wild type                                                                                                      | ATCC                |
| JPTM5                         | $\Delta$ <i>hilD::kan</i>                                                                                      | (2)                 |
| <i>E. coli</i> K-12 strains   |                                                                                                                |                     |
| DH5 $\alpha$                  | Laboratory strain                                                                                              | Invitrogen          |
| SU101                         | Reporter strain of the LexA-based genetic system for homodimerization assays; Kan <sup>R</sup>                 | (3)                 |
| SU202                         | Reporter strain of the LexA-based genetic system for heterodimerization assays; Kan <sup>R</sup>               | (3)                 |
| BL21/DE3                      | Strain for expression of recombinant protein                                                                   | Invitrogen          |
| MC4100                        | Cloning strain                                                                                                 | (4)                 |
| <b>Plasmids</b>               |                                                                                                                |                     |
| pSR658                        | Vector expressing LexA <sub>DBDwt</sub> for homodimerization assays; Tc <sup>R</sup>                           | (5)                 |
| pSR658-HilD1                  | pSR658 derivative expressing LexA <sub>DBDwt</sub> -HilD <sub>1-309</sub> ; Tc <sup>R</sup>                    | This study          |
| pSR658-HilD2                  | pSR658 derivative expressing LexA <sub>DBDwt</sub> -HilD <sub>1-130</sub> ; Tc <sup>R</sup>                    | This study          |
| pSR658-HilD3                  | pSR658 derivative expressing LexA <sub>DBDwt</sub> -HilD <sub>130-309</sub> ; Tc <sup>R</sup>                  | This study          |
| pSR658-HilD4                  | pSR658 derivative expressing the LexA <sub>DBDwt</sub> -HilD <sub>1-220</sub> ; Tc <sup>R</sup>                | This study          |
| pSR658-HilD5                  | pSR658 derivative expressing the LexA <sub>DBDwt</sub> -HilD <sub>221-309</sub> ; Tc <sup>R</sup>              | This study          |
| pSR658-HilD6                  | pSR658 derivative expressing the LexA <sub>DBDwt</sub> -LZ-HilD <sub>221-309</sub> ; Tc <sup>R</sup>           | This study          |
| pSR658-HNS                    | pSR658 derivative expressing LexA <sub>DBDwt</sub> -H-NS; Tc <sup>R</sup>                                      | (6)                 |
| pSR659                        | Vector expressing LexA <sub>DBDmut</sub> for heterodimerization assays; Ap <sup>R</sup>                        | (5)                 |
| pSR659-HilE1                  | pSR659 derivative expressing the LexA <sub>DBDmut</sub> -HilE fusion; Ap <sup>R</sup>                          | This study          |
| pMAL-c2x                      | Expressing vector for constructing Maltose binding protein (MBP) fusions, <i>lac</i> promoter; Ap <sup>R</sup> | New England Biolabs |
| pMAL-HilD1                    | pMAL-c2x derivative expressing MBP-HilD fusion protein; Ap <sup>R</sup>                                        | (2)                 |
| pMPM-A6 $\Omega$              | Cloning vector p15A derivative low-copy-number, <i>ara</i> promoter; Ap <sup>R</sup>                           | (7)                 |

|            |                                                                                                                                     |            |
|------------|-------------------------------------------------------------------------------------------------------------------------------------|------------|
| pA6-HilE1  | pMPM-A6Ω derivative expressing HilE; Ap <sup>R</sup>                                                                                | This study |
| pMPM-K6Ω   | Cloning vector p15A derivative low-copy-number, <i>ara</i> promoter; Kan <sup>R</sup>                                               | (7)        |
| pK6-HilE1  | pMPM-K6Ω derivative expressing HilE; Kan <sup>R</sup>                                                                               | This study |
| pUT18C-zip | Vector expressing 35 amino acids of the leucine zipper motif from GCN4 fused in frame with the T18 fragment of CyA; Ap <sup>R</sup> | Euromedex  |
| pET32b(+)  | Expressing vector for constructing Thioredoxin (Trx) fusions, T7 promoter; Ap <sup>R</sup>                                          | Novagen    |
| pET32-HilE | pET32b(+) derivative expressing Trx-HilE; Ap <sup>R</sup>                                                                           | This study |
| pBAD-HilD1 | pBADMyHis derivative expressing HilD-MyHis; Ap <sup>R</sup>                                                                         | (6)        |
| philA-cat1 | pKK232-8 derivative expressing a <i>hila-cat</i> transcriptional fusion from nucleotides - 410 to + 446                             | (2)        |

Ap<sup>R</sup>, ampicillin resistance; Sm<sup>R</sup> streptomycin resistance; Kan<sup>R</sup>, kanamycin resistance; Tc<sup>R</sup>, tetracycline resistance.

Table S2. Primers used in this study

| Primer           | Sequence (5'-3')                                                                | Target gene  | RE      |
|------------------|---------------------------------------------------------------------------------|--------------|---------|
| HilD-SacI        | GAT <u>GAG CTC</u> GAA AAT GTA ACC TTT GTA<br>AGT AAT AG                        | <i>hilD</i>  | SacI    |
| HilDexR-PstI     | TCC <u>CTG CAG AAC</u> AAT GAT ATT GAA TAG C                                    | <i>hilD</i>  | PstI    |
| HilD130-5'       | CCC ACA <u>GAG CTC</u> GCG CAG AAG ATC TTC<br>TAT ACG                           | <i>hilD</i>  | SacI    |
| HilD-130         | ATA GAA <u>CTG CAG</u> TTA CGC TTT CTC TGT<br>GGG TAC CG                        | <i>hilD</i>  | PstI    |
| HilD-220         | AAG CTT <u>CTG CAG</u> TTA ACT GGG TGA CGA<br>AGA TAT AAT G                     | <i>hilD</i>  | PstI    |
| HilD-221         | TCG TCA <u>GAG CTC</u> AGA CAG TGG AAG CTT<br>ACG GAT G                         | <i>hilD</i>  | SacI    |
| LZ-F             | GTA <u>CTC GAG CAG</u> CGT ATG AAA CAG<br>CTG GAA G                             | <i>gcn4*</i> | XhoI    |
| LZ-HilD221F      | GAA AAA ACT GGT GGG TGA ACG TAG ACA<br>GTG GAA GCT TAC GGA TG                   | <i>gcn4*</i> |         |
| HilD221LZR       | CAT CCG TAA GCT TCC ACT GTC TAC GTT CAC<br>CCA CCA GTT TTT TC                   | <i>hilD</i>  |         |
| HilE-SacI        | GGG <u>GAG CTC</u> GAC GCC ATC TAT TTA AAA<br>CTG G                             | <i>hilE</i>  | SacI    |
| HilE- HindIII-3' | TCC <u>GCA AGC TTG</u> TTT TGT CC                                               | <i>hilE</i>  | HindIII |
| HilE-NcoI-2      | GAG GGG <u>CCA TGG</u> ACG CCA TCT ATT TAA<br>AAC TGG                           | <i>hilE</i>  | NcoI    |
| HilE-His6        | CCC <u>AAG CTT</u> TCC TCA ATG ATG ATG ATG<br>ATG ATG TCG CCA CAG CGC CTG TCG G | <i>hilE</i>  | HindIII |
| HilE-PUT-BamHI   | ATA <u>ACG GAT CCG</u> AGG GCC ACG CGT TAT<br>CGC                               | <i>hilE</i>  | BamHI   |
| HilCRR-F         | GGA ATG TAA TTA TTG GCT ATA ATA ATA<br>AAA AAA TCG GAT TTA AAT CAT CT           | <i>hilC</i>  |         |
| HilCRR-R         | GAG ATG ATT TAA ATC CGA TTT TTT TAT TAT<br>TAT AGC CAA TAA TTA CAT TC           | <i>hilC</i>  |         |

RE, restriction enzyme for which a site was generated in the primer. Underlined letters indicate the respective restriction-enzyme site in the primer. \* *gcn4* carried by pUT18C-zip (Table 1).

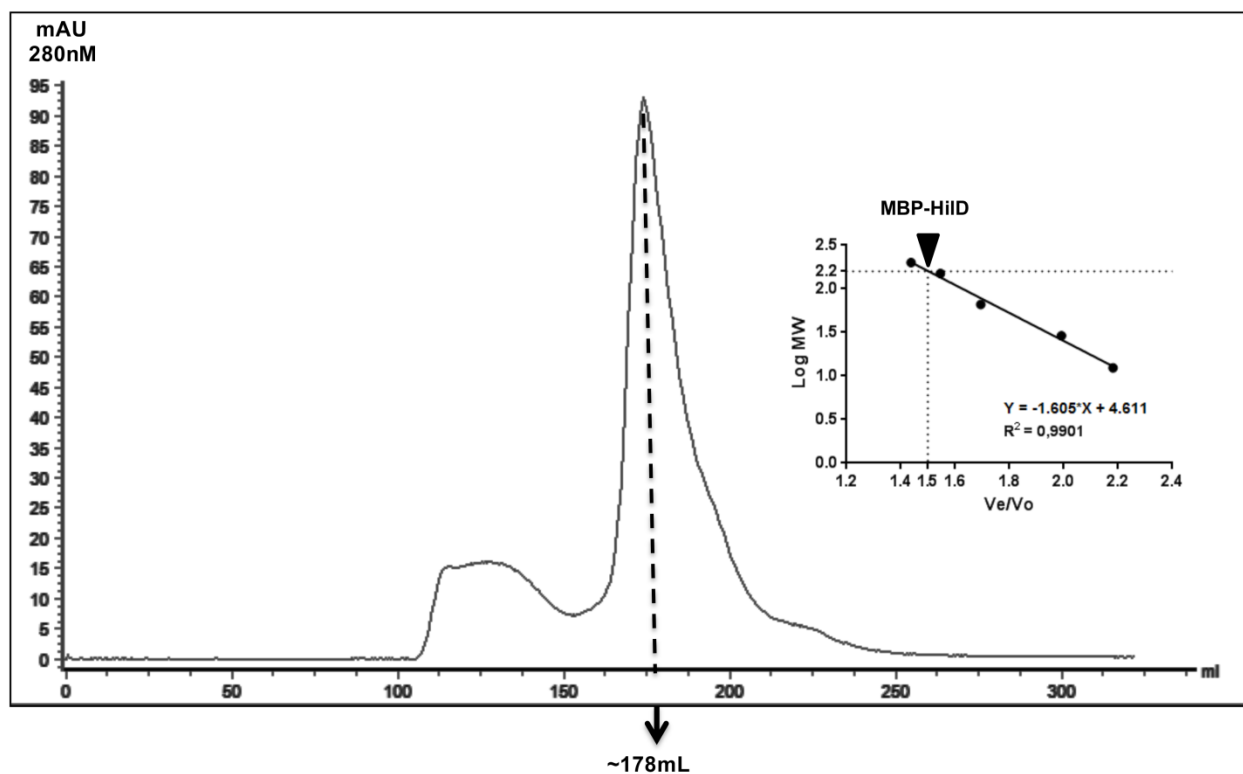

**Figure S1. Gel filtration chromatography of MBP-HiID.** Chromatogram showing the elution profile of MBP-HiID, fractionated on a Superdex 200 column (HiLoad™ 16/60), in a buffer containing 200 mM Tris-HCl pH 8.0 and 150 mM NaCl. On the right, a five-point calibration curve was performed using the Gel Filtration Molecular Weight Markers Kit (Sigma-Aldrich). The arrow indicates the relative molecular mass of MBP-HiID calculated by comparison with the five-point calibration curve.

*E. coli* MG1655

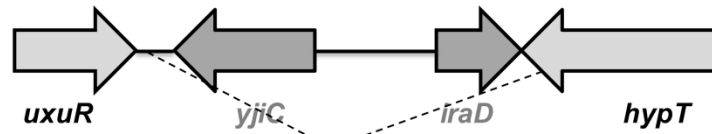

*S. Typhimurium* SL1344

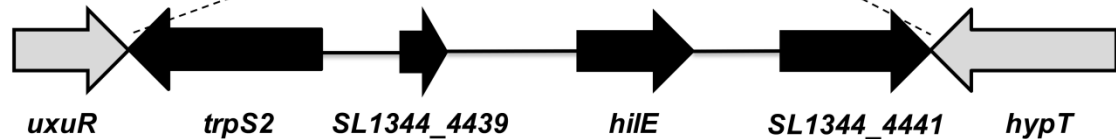

|         |      |      |      |      |      |      |
|---------|------|------|------|------|------|------|
| % G + C | 54.6 | 52.9 | 33.3 | 49.2 | 55.6 | 52.3 |
|---------|------|------|------|------|------|------|

*S. bongori* NCTC 12419

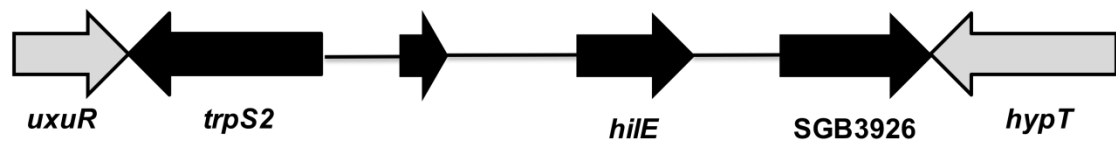

**Figure S2. The *hilE* gene is located in a genomic island of *S. Typhimurium* and *S. bongori* that is absent in *E. coli* K-12.** Schematic view of the DNA region between the *uxuR* and *hypT* ancestral genes in *E. coli* K-12 MG1655, *S. Typhimurium* SL1344 and *S. bongori* NCTC 12419. The *hilE* gene is present in *S. Typhimurium* and *S. bongori*, but not in *E. coli* K-12. The *trpS2*, *SL1344\_4438* and *SL1344\_4431* genes encode for a tryptophanyl-tRNA synthetase, a hypothetical protein and a putative aspartate-racemase, respectively. The G + C content for each of the *S. Typhimurium* SL1344 genes is shown.

## Supplementary references

1. Hoiseth, S. K., and Stocker, B. A. (1981) Aromatic-dependent *Salmonella* Typhimurium are non-virulent and effective as live vaccines. *Nature* **291**, 238-239
2. Bustamante, V. H., Martinez, L. C., Santana, F. J., Knodler, L. A., Steele-Mortimer, O., and Puente, J. L. (2008) HilD-mediated transcriptional cross-talk between SPI-1 and SPI-2. *Proc. Natl. Acad. Sci. U S A.* **105**, 14591-14596
3. Dmitrova, M., Younes-Cauet, G., Oertel-Buchheit, P., Porte, D., Schnarr, M., and Granger-Schnarr, M. (1998) A new LexA-based genetic system for monitoring and analyzing protein heterodimerization in *Escherichia coli*. *Mol. Gen. Genet.* **257**, 205-212
4. Casadaban, M. J. (1976) Transposition and fusion of the *lac* genes to selected promoters in *Escherichia coli* using bacteriophage lambda and Mu. *J Mol Biol* **104**, 541-555
5. Daines, D. A., and Silver, R. P. (2000) Evidence for multimerization of neu proteins involved in polysialic acid synthesis in *Escherichia coli* K1 using improved LexA-based vectors. *J. Bacteriol.* **182**, 5267-5270
6. Martinez, L. C., Yakhnin, H., Camacho, M. I., Georgellis, D., Babitzke, P., Puente, J. L., and Bustamante, V. H. (2011) Integration of a complex regulatory cascade involving the SirA/BarA and Csr global regulatory systems that controls expression of the *Salmonella* SPI-1 and SPI-2 virulence regulons through HilD. *Mol. Microbiol.* **80**, 1637-1656
7. Mayer, M. P. (1995) A new set of useful cloning and expression vectors derived from pBlueScript. *Gene* **163**, 41-46
